# Supplementary material
Source: HighWire-hosted journal article supplement (https://www.cmajopen.ca/highwire/filestream/85767/field_highwire_adjunct_files/0/2020-0230-1-at.pdf)
Supplement: 2020-0230-1-at.pdf [file 2020-0230-1-at.pdf]

**Appendix Table. World Health Organisation Anatomical Therapeutic Chemical (ATC) classification therapeutic/pharmacological subgroups of cardiovascular medications included for persons subjects aged 65 years and older.**

| <b>Medication class</b>                  | <b>ATC code(s)</b> |
|------------------------------------------|--------------------|
| Angiotensin-converting-enzyme inhibitors | C09AA, C09B        |
| Angiotensin II receptor blockers         | C09CA, C09D        |
| Antihypertensives                        | C02                |
| Beta blockers                            | C07                |
| Calcium channel blockers                 | C08                |
| Nitrates                                 | C01DA              |
| Diabetic agents                          | A10                |
| Antihyperlipidemic agents                | C10                |
| Diuretics                                | C03                |
| Mineralocorticoid receptor antagonists   | C03DA              |

Source: [https://www.who.int/medicines/regulation/medicines-safety/toolkit\\_atc/en/](https://www.who.int/medicines/regulation/medicines-safety/toolkit_atc/en/) and [https://www.who.int/medicines/regulation/medicines-safety/toolkit\\_ddd/en/](https://www.who.int/medicines/regulation/medicines-safety/toolkit_ddd/en/)
